# Supplementary material for: On the passivation of iron particles at the nanoscale
Source: Royal Society of Chemistry journal article supplement (doi:10.1039/c9na00161a), 2019-01-01
Supplement: c9na00161a1.pdf [file c9na00161a1.pdf]

# Electronic Supplementary Information:

## On the passivation of iron particles on the nanoscale

Maximilian Lasserus,<sup>†</sup> Daniel Knez,<sup>†</sup> Martin Schnedlitz,<sup>†</sup> Andreas W. Hauser,<sup>\*,†</sup>  
Ferdinand Hofer,<sup>†</sup> and Wolfgang E. Ernst<sup>\*,†</sup>

<sup>†</sup>*Institute of Experimental Physics, Graz University of Technology, Petersgasse 16, A-8010  
Graz, Austria. Fax: +43 (316) 873-108140; Tel: +43 (316) 873-8157; +43 (316) 873-8140;*

<sup>‡</sup>*Institute for Electron Microscopy and Nanoanalysis & Graz Centre for Electron  
Microscopy, Graz University of Technology, Steyrergasse 17, A-8010 Graz, Austria.*

E-mail: andreas.w.hauser@gmail.com; wolfgang.ernst@tugraz.at

In the first section of this Supporting Information we present a simplified graphical overview of our experimental setup. Section 2 contains a statistical evaluation of the species deposited on the TEM substrate. Section 3 discusses a model in which the core/shell ratio of ideal icosahedral clusters is analyzed, and uses this information to correlate doping rates to actual compositions for the various particle sizes. Section 4 lists the geometries of all intermediate states after atomic swapping as obtained from DFT optimizations.

# Contents

|          |                                                                |          |
|----------|----------------------------------------------------------------|----------|
| <b>1</b> | <b>Experimental setup</b>                                      | <b>4</b> |
| <b>2</b> | <b>Types of metallic particles and their distribution</b>      | <b>5</b> |
| <b>3</b> | <b>Closed shell model</b>                                      | <b>6</b> |
| <b>4</b> | <b>DFT geometries</b>                                          | <b>7</b> |
| 4.1      | Geometries before O <sub>2</sub> adsorption . . . . .          | 7        |
| 4.1.1    | One layer . . . . .                                            | 7        |
| 4.1.2    | Two layers . . . . .                                           | 8        |
| 4.1.3    | Three layers . . . . .                                         | 10       |
| 4.2      | Geometries after O <sub>2</sub> adsorption . . . . .           | 12       |
| 4.2.1    | One layer . . . . .                                            | 12       |
| 4.2.2    | Two layers . . . . .                                           | 14       |
| 4.2.3    | Three layers . . . . .                                         | 15       |
| 4.3      | Swapped geometries, before O <sub>2</sub> adsorption . . . . . | 17       |
| 4.3.1    | One layer . . . . .                                            | 17       |
| 4.3.2    | Two layers, swap in 1 <sup>st</sup> layer . . . . .            | 19       |
| 4.3.3    | Two layers, swap in 2 <sup>nd</sup> layer . . . . .            | 21       |
| 4.3.4    | Three layers, swap in 1 <sup>st</sup> layer . . . . .          | 22       |
| 4.3.5    | Three layers, swap in 2 <sup>nd</sup> layer . . . . .          | 24       |
| 4.3.6    | Three layers, swap in 3 <sup>rd</sup> layer . . . . .          | 26       |
| 4.4      | Swapped geometries, after O <sub>2</sub> adsorption . . . . .  | 28       |
| 4.4.1    | One layer . . . . .                                            | 28       |
| 4.4.2    | Two layers, swap in 1 <sup>st</sup> layer . . . . .            | 30       |
| 4.4.3    | Two layers, swap in 2 <sup>nd</sup> layer . . . . .            | 32       |
| 4.4.4    | Three layers, swap in 1 <sup>st</sup> layer . . . . .          | 33       |

|       |                                                       |    |
|-------|-------------------------------------------------------|----|
| 4.4.5 | Three layers, swap in 2 <sup>nd</sup> layer . . . . . | 35 |
| 4.4.6 | Three layers, swap in 3 <sup>rd</sup> layer . . . . . | 37 |

# 1 Experimental setup

A schematic of the He-droplet apparatus is presented in Figure 1. Our setup consists of three vacuum chambers, one for the helium droplet production (Source Chamber SC), one for the doping of the droplets (Pickup Chamber PC), containing the two evaporation cells filled with Fe and Au, and one for mass spectra analysis and the deposition on TEM grids (Main Chamber MC).

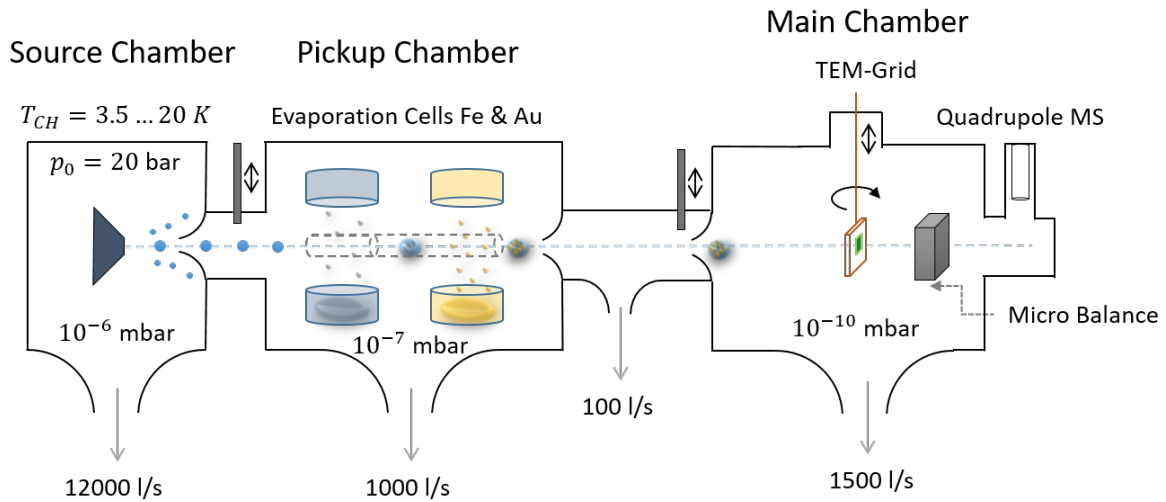

Figure 1: Schematic of the experimental setup used for the synthesis of Fe/Au nano structures inside liquid He droplets; see text for details.

## 2 Types of metallic particles and their distribution

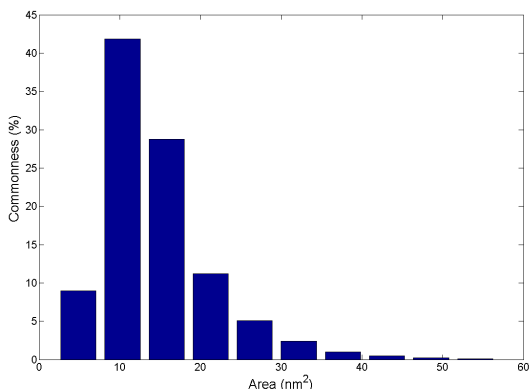

Figure 2: Histogram of sizes (area) of metallic particles synthesized and deposited in the current setup.

Figure 2 shows the size distribution of metallic structures deposited on the TEM grid in the course of He-mediated synthesis. The histogram is based on a classification of  $\approx 1000$  metal clusters (mixed and pure metal clusters).

A pie chart of the types of mixed-metallic nanoparticles (i.e. excluding pure Fe and Au clusters) is presented in Figure 3. It is based on a data set comprising  $\approx 530$  clusters whose structure could be clearly identified. In total, only 8 % of these mixed structures correspond to successfully passivated Fe cores, the rest is formed by the particularly interesting 3-layered, partially oxidized structures (32 %) and the fully oxidized particles (60 %). The latter can be further divided into core@shell and janus structures, showing a slight preference for the janus-type (36 %).

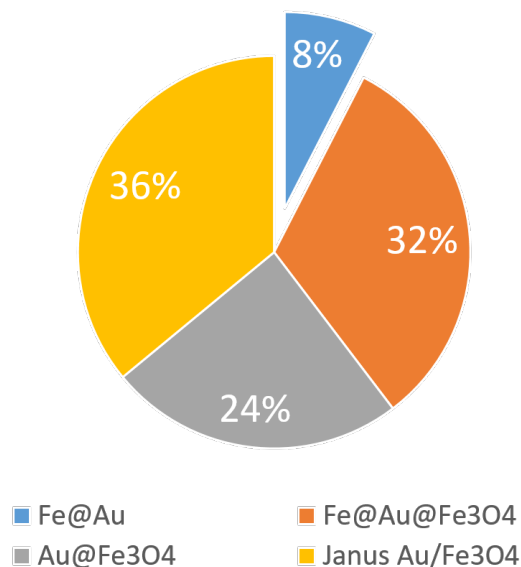

Figure 3: Distribution of nanostructures obtained via a two-step doping of helium droplets.

### 3 Closed shell model

The main manuscript mentions the variation of the doping rate as a convenient handle to control the distribution of Fe and Au the nano structures. Table 1 correlates the doping ratio with the number of atoms in a cluster of certain size and its estimated number of Au layers. This estimation is based on a simple model assuming magic numbers of icosahedral core@shell geometries which are reasonably close to the desired ratio. It spans different cluster sizes from 1000 to 5000 atoms; the ratio is varied from 25 to 50 and 75 % Fe. Note that three additional shells as required for the effective passivation of the Fe core can be realized only in mixtures containing 25 % of Fe or less.

Table 1: Correlations between doping ratio, number of atoms, and estimated layers of shell material.

| clusters<br>atoms | <u>≈25% Fe</u> |          |          | <u>≈50% Fe</u> |          |          | <u>≈75% Fe</u> |          |         |
|-------------------|----------------|----------|----------|----------------|----------|----------|----------------|----------|---------|
|                   | $N_{Fe}$       | $N_{Au}$ | Sum      | $N_{Fe}$       | $N_{Au}$ | Sum      | $N_{Fe}$       | $N_{Au}$ | Sum     |
| 1000              | 147            | 776      | 923      | 561            | 854      | 1415     | 561            | 362      | 923     |
|                   | 3              | 6        | 3 shells | 5              | 7        | 2 shells | 5              | 6        | 1 shell |
| 2000              | 561            | 1496     | 2057     | 923            | 1134     | 2057     | 1415           | 642      | 2057    |
|                   | 5              | 8        | 3 shells | 6              | 8        | 2 shells | 7              | 8        | 1 shell |
| 3000              | 923            | 1946     | 2869     | 1415           | 1454     | 2869     | 2057           | 812      | 2869    |
|                   | 6              | 9        | 3 shells | 7              |          | 2 shells | 8              | 9        | 1 shell |
| 4000              | 1415           | 2456     | 3871     | 2057           | 1814     | 3871     | 2869           | 1002     | 3871    |
|                   | 7              | 10       | 3 shells | 8              | 10       | 2 shells | 9              | 10       | 1 shell |
| 5000              | 1415           | 3668     | 5083     | 2869           | 2214     | 5083     | 3871           | 1212     | 5083    |
|                   | 7              | 11       | 3 shells | 9              | 11       | 2 shells | 10             | 11       | 1 shell |

## 4 DFT geometries

This section provides all bulk structures as obtained from partially constrained DFT optimizations with the PBE functional (Fe atoms are kept frozen); see main manuscript for details. We present all unperturbed geometries as well as all intermediate states, obtained by atomic swapping, i.e. exchanging a Fe atom from the interface layer with an Au atom of the upper layers. All geometries are given in Cartesian format in units of Ångstrom. Supercell dimensions  $x$ ,  $y$  and  $z$  were set to 8.60 Å, 8.60 Å, and 20.00 Å, respectively. The formatting supports direct copy and paste from the pdf document.

### 4.1 Geometries before O<sub>2</sub> adsorption

#### 4.1.1 One layer

36

```
Fe 0.000000000 0.000000000 0.000000000
Fe -0.209619780 0.101432951 2.361919896
Fe 0.000000000 2.866500000 0.000000000
Fe -0.105844327 2.974581928 2.277108325
Fe 0.000000000 5.733000000 0.000000000
Fe -0.030519771 5.545744462 2.314461000
Fe 2.866500000 0.000000000 0.000000000
Fe 3.073919673 -0.196329685 2.394530491
Fe 2.866500000 2.866500000 0.000000000
Fe 2.774344217 3.082720259 2.359460247
Fe 2.866500000 5.733000000 0.000000000
Fe 2.701097942 5.654822556 2.352494753
Fe 5.733000000 0.000000000 0.000000000
Fe 5.822752013 0.169838762 2.354752559
```

Fe 5.733000000 2.866500000 0.000000000  
Fe 5.923519407 2.901441793 2.315029530  
Fe 5.733000000 5.733000000 0.000000000  
Fe 6.072987286 5.410251878 2.615357976  
Fe 1.559467641 1.309371747 1.245748410  
Fe 1.463620532 4.305106663 0.814899541  
Fe 1.386210279 7.378023501 1.276193367  
Fe 4.091789161 1.484223524 1.267997204  
Fe 4.377445366 4.527618265 1.283609998  
Fe 4.516330933 6.957180873 1.369631302  
Fe 7.162960348 1.406445056 0.813213339  
Fe 7.145597723 4.322040051 0.798472199  
Fe 6.947610965 7.096762938 1.272334748  
Au 4.295327840 1.468850823 4.045688588  
Au 7.269660189 4.210437418 4.448993639  
Au 4.418441012 7.061070770 4.086585108  
Au 1.447826000 1.428956970 3.983614200  
Au 4.316041976 4.262905222 4.132432196  
Au 1.408986960 7.179907679 4.043121653  
Au -1.418700529 1.450026172 4.218735341  
Au 1.430264939 4.292346244 4.215005448  
Au -1.383742936 7.162664516 4.136567735

#### 4.1.2 Two layers

45

Fe 0.000000000 0.000000000 0.000000000  
Fe -0.008512726 0.011923532 2.226893151  
Fe 0.000000000 2.866500000 0.000000000



Fe -0.215166069 2.629546343 2.449489936  
Fe 0.000000000 5.733000000 0.000000000  
Fe 0.201282796 5.942237336 2.405106411  
Fe 2.866500000 0.000000000 0.000000000  
Fe 2.655054423 -0.182108666 2.404845094  
Fe 2.866500000 2.866500000 0.000000000  
Fe 3.121981954 3.000717603 2.402209267  
Fe 2.866500000 5.733000000 0.000000000  
Fe 2.821596870 5.782619803 2.240022913  
Fe 5.733000000 0.000000000 0.000000000  
Fe 5.984813032 0.205584128 2.449850667  
Fe 5.733000000 2.866500000 0.000000000  
Fe 5.726448332 2.874974640 2.230155562  
Fe 5.733000000 5.733000000 0.000000000  
Fe 5.580783813 5.483565252 2.404679104  
Fe 1.524268249 1.630404007 1.270119516  
Fe 1.304343029 4.140185880 1.273937151  
Fe 1.425475446 7.178759460 0.809690630  
Fe 4.228476171 1.226372352 1.271124105  
Fe 4.251448129 4.342775343 0.838917480  
Fe 4.456986948 7.303888986 1.276850936  
Fe 7.141673125 1.456253485 0.817555241  
Fe 7.362191974 4.391416670 1.271405359  
Fe 6.982419079 7.061100658 1.270045970  
Au 4.314729878 1.404266652 4.138873768  
Au 7.193923135 4.292896665 4.139095640  
Au 4.329005752 7.154011982 4.101295312  
Au 1.454982221 1.428306998 4.136467246  
Au 4.313290393 4.282503562 4.285939520

Au 1.449878399 7.154932682 4.296964930  
Au -1.414016166 1.421157132 4.348125722  
Au 1.444921088 4.274761335 4.101506572  
Au -1.420022135 7.145137574 4.137231203  
Au 0.038004390 2.881868958 6.270742327  
Au 5.739043093 2.862835075 6.318863730  
Au 2.860580677 2.831404568 6.257365796  
Au 2.881732825 5.707482936 6.295753229  
Au 8.600949408 5.704428343 6.263541202  
Au 5.759733760 5.734722567 6.257410511  
Au 0.034809852 8.576796172 6.323479643  
Au 2.912092117 8.592327691 6.256880040  
Au 5.735489924 8.557742730 6.272877239

### 4.1.3 Three layers

54

Fe 0.000000000 0.000000000 0.000000000  
Fe 0.041880121 -0.046382325 2.279165911  
Fe 0.000000000 2.866500000 0.000000000  
Fe -0.297237884 2.575290914 2.449367195  
Fe 0.000000000 5.733000000 0.000000000  
Fe 0.073888899 5.941865461 2.345364950  
Fe 2.866500000 0.000000000 0.000000000  
Fe 2.870813752 -0.036902419 2.278509739  
Fe 2.866500000 2.866500000 0.000000000  
Fe 3.128788627 2.793216058 2.375510836  
Fe 2.866500000 5.733000000 0.000000000  
Fe 2.607545077 5.880792824 2.349030592

Fe 5.733000000 0.000000000 0.000000000  
Fe 5.621268344 0.334827666 2.370754161  
Fe 5.733000000 2.866500000 0.000000000  
Fe 5.737633407 2.886870426 2.228768703  
Fe 5.733000000 5.733000000 0.000000000  
Fe 5.934491749 5.468962753 2.432429062  
Fe 1.441282045 1.675446696 1.292861259  
Fe 1.307154202 4.139425246 1.362105360  
Fe 1.445446875 7.209594995 0.833862516  
Fe 4.256536664 1.439477755 0.845952125  
Fe 4.219018248 4.548119950 1.294301395  
Fe 4.456370800 7.045033801 1.318565585  
Fe 7.144467483 1.362532667 0.883108472  
Fe 7.450793520 4.300372124 1.224004829  
Fe 6.902898077 7.202659348 1.339688059  
Au 4.272919886 1.440416697 4.293840282  
Au 7.218971708 4.224940944 4.276617851  
Au 4.311270405 7.161549657 4.110342657  
Au 1.429977859 1.454086896 4.151980256  
Au 4.312994922 4.320129195 4.198544139  
Au 1.424694041 7.218717416 4.271736466  
Au -1.479478089 1.354724558 4.322373059  
Au 1.443323797 4.293349061 4.126362220  
Au -1.460763535 7.143963504 4.167074173  
Au 0.021947589 2.843273956 6.351035741  
Au 5.726109397 2.852163196 6.385632039  
Au 2.849457523 2.884747369 6.331285613  
Au 2.884402771 5.737343678 6.309236526  
Au 8.612894048 5.714534647 6.334772902

Au 5.745344076 5.720235062 6.319870281  
Au -0.002705799 8.583977219 6.364397898  
Au 2.864036529 8.604241077 6.347433295  
Au 5.715573364 8.549715459 6.362997362  
Au -1.437937138 1.400015941 8.406958656  
Au 4.274762500 1.429312644 8.392987023  
Au 1.426348947 1.442503365 8.429223851  
Au -1.419051707 4.280435683 8.389521494  
Au 4.299049301 4.311923097 8.382935310  
Au 1.448113661 4.296640462 8.407083497  
Au -1.429846915 7.131019467 8.411296278  
Au 1.454067452 7.156531740 8.360690938  
Au 4.312673226 7.158364202 8.419753735

## 4.2 Geometries after O<sub>2</sub> adsorption

### 4.2.1 One layer

38

Fe 0.000000000 0.000000000 0.000000000  
Fe -0.109908134 -0.281251175 2.399569282  
Fe 0.000000000 2.866500000 0.000000000  
Fe 0.219368053 3.113815165 2.463819847  
Fe 0.000000000 5.733000000 0.000000000  
Fe -0.002036562 5.721454011 2.226057140  
Fe 2.866500000 0.000000000 0.000000000  
Fe 2.979787020 0.162902268 2.351755556  
Fe 2.866500000 2.866500000 0.000000000  
Fe 2.909520866 2.783019646 2.281065196

Fe 2.866500000 5.733000000 0.000000000  
Fe 2.516737423 5.660967993 2.412876654  
Fe 5.733000000 0.000000000 0.000000000  
Fe 5.640298701 0.119482915 2.283623208  
Fe 5.733000000 2.866500000 0.000000000  
Fe 5.530003325 2.701884591 2.385887960  
Fe 5.733000000 5.733000000 0.000000000  
Fe 6.021679781 5.781802898 2.385308890  
Fe 1.191724855 1.390462212 1.290611263  
Fe 1.485960307 4.264257727 0.869620678  
Fe 1.535295685 7.279487424 1.059874068  
Fe 4.295851757 1.428805021 0.808657036  
Fe 4.293209852 4.523355753 1.334512796  
Fe 4.265067398 6.960857314 1.330559580  
Fe 7.348795611 1.527336403 1.286748619  
Fe 7.103192272 4.061050174 1.239586424  
Fe 7.094421615 7.207734547 0.882494445  
Au 4.281840929 1.422977709 4.261395319  
Au 7.148435513 4.237972213 4.116634052  
Au 4.290028617 7.150165675 4.008116215  
Au 1.416837584 1.427000266 4.088435928  
Au 4.276357855 4.313201184 4.029486331  
Au 1.421528473 7.211520172 4.150079429  
Au -1.407907265 1.420592060 4.039898921  
Au 1.416332924 4.318235760 4.324970727  
Au -1.442980318 7.158236247 4.231523764  
O 4.240776928 5.091229150 6.105844727  
O 4.276844338 6.414763895 6.100345150

## 4.2.2 Two layers

47

```
Fe 0.000000000 0.000000000 0.000000000
Fe -0.144168923 0.237304005 2.379623187
Fe 0.000000000 2.866500000 0.000000000
Fe -0.016075003 2.856405799 2.238855783
Fe 0.000000000 5.733000000 0.000000000
Fe 0.239136119 5.480101031 2.466886674
Fe 2.866500000 0.000000000 0.000000000
Fe 2.962881816 -0.240925681 2.385375175
Fe 2.866500000 2.866500000 0.000000000
Fe 2.620841180 3.122803218 2.470675653
Fe 2.866500000 5.733000000 0.000000000
Fe 2.864040464 5.727987604 2.233982594
Fe 5.733000000 0.000000000 0.000000000
Fe 5.781142966 0.041840752 2.249098173
Fe 5.733000000 2.866500000 0.000000000
Fe 5.973354664 2.736722726 2.388946206
Fe 5.733000000 5.733000000 0.000000000
Fe 5.482264425 5.851209996 2.393595551
Fe 1.653053002 1.394750864 1.266613641
Fe 1.433722953 4.304037062 0.823369158
Fe 1.207306042 7.217469481 1.278925930
Fe 4.148230162 1.569344855 1.298988923
Fe 4.356739406 4.080279615 1.266302758
Fe 4.332927739 7.205422386 0.847534313
Fe 7.140068709 1.408228943 0.825498181
```

Fe 7.103887820 4.519462336 1.272813942  
Fe 7.300561918 7.013489056 1.291336449  
Au 4.290168569 1.433903774 4.079412449  
Au 7.162764174 4.311848081 4.164221230  
Au 4.287317614 7.146682494 4.256998516  
Au 1.442361015 1.429927642 4.141904613  
Au 4.298156983 4.283841641 4.159479220  
Au 1.412989404 7.158370556 4.159551511  
Au -1.430793964 1.438614040 4.274789174  
Au 1.429754906 4.312044826 4.389671253  
Au -1.428679252 7.149537505 4.091127830  
Au -0.026546481 2.854183814 6.324704778  
Au 5.704813916 2.858640879 6.261486770  
Au 2.880522924 2.808298268 6.275943706  
Au 2.777669106 5.719874731 6.407754360  
Au 8.564245311 5.752597845 6.377875855  
Au 5.795095914 5.714654703 6.251485523  
Au 0.010081105 8.579756536 6.242878258  
Au 2.858053694 8.607187027 6.225243370  
Au 5.734666615 8.602984482 6.250062146  
O 4.237996541 5.951376432 8.145668387  
O 4.245447643 5.060538658 9.063678655

### 4.2.3 Three layers

56

Fe 0.000000000 0.000000000 0.000000000  
Fe 0.047649559 -0.061893452 2.285675345  
Fe 0.000000000 2.866500000 0.000000000

Fe -0.301497639 2.574123197 2.457099527  
Fe 0.000000000 5.733000000 0.000000000  
Fe 0.076883351 5.940760070 2.353759375  
Fe 2.866500000 0.000000000 0.000000000  
Fe 2.899933691 -0.005838338 2.273688751  
Fe 2.866500000 2.866500000 0.000000000  
Fe 3.115007049 2.806133613 2.378230084  
Fe 2.866500000 5.733000000 0.000000000  
Fe 2.610159100 5.886494522 2.352715213  
Fe 5.733000000 0.000000000 0.000000000  
Fe 5.610251843 0.333389739 2.379466442  
Fe 5.733000000 2.866500000 0.000000000  
Fe 5.730104325 2.877191672 2.230912528  
Fe 5.733000000 5.733000000 0.000000000  
Fe 5.934405750 5.492991730 2.436059383  
Fe 1.437547410 1.673537789 1.286335272  
Fe 1.306893365 4.133436437 1.355723920  
Fe 1.445102841 7.207703101 0.836127375  
Fe 4.268288887 1.443641969 0.826209477  
Fe 4.226554151 4.546585592 1.291027951  
Fe 4.449487526 7.044485872 1.305460297  
Fe 7.158789978 1.361754985 0.886544914  
Fe 7.444661947 4.302175257 1.231693080  
Fe 6.907084489 7.213641879 1.337072854  
Au 4.280324120 1.463391147 4.291570474  
Au 7.224214797 4.236417562 4.270536896  
Au 4.314763930 7.178048679 4.109447027  
Au 1.429993640 1.455635755 4.142221712  
Au 4.327372847 4.334857952 4.189143767



Au 1.424480532 7.230876156 4.265191740  
Au -1.480865771 1.370775910 4.337408479  
Au 1.447526743 4.294912800 4.124326793  
Au -1.457741918 7.163532444 4.167319624  
Au 0.012517666 2.876358307 6.377242026  
Au 5.726024135 2.892391794 6.418312437  
Au 2.842867646 2.924466750 6.307924148  
Au 2.871638041 5.780333298 6.320941416  
Au 8.611612937 5.756191613 6.325876453  
Au 5.729638136 5.758100316 6.309097111  
Au -0.005475112 8.620141237 6.393654284  
Au 2.855165218 8.648822705 6.330956363  
Au 5.715259644 8.593786364 6.392696451  
Au -1.417187922 1.443691195 8.418468693  
Au 4.286768576 1.484883702 8.479323874  
Au 1.446830278 1.504673675 8.502867032  
Au -1.455596014 4.355309205 8.457671093  
Au 4.320681084 4.267968873 8.393720862  
Au 1.353460855 4.266905162 8.401769283  
Au -1.439446183 7.153184439 8.453135466  
Au 1.383100945 7.331073581 8.429589494  
Au 4.338505029 7.319576354 8.431723403  
O 3.553049047 5.777528280 9.929085556  
O 2.164948477 5.811974077 9.932412828

## 4.3 Swapped geometries, before O<sub>2</sub> adsorption

### 4.3.1 One layer

Fe 0.00000000 0.00000000 0.00000000  
Fe 0.270910130 -0.246821697 2.563455821  
Fe 0.000000000 2.866500000 0.000000000  
Fe -0.006615561 3.118352458 2.392829997  
Fe 0.000000000 5.733000000 0.000000000  
Fe 0.075818877 5.703477137 2.309496868  
Fe 2.866500000 0.000000000 0.000000000  
Fe 2.814993411 -0.103319275 2.314162065  
Fe 2.866500000 2.866500000 0.000000000  
Au 2.894614367 2.820242326 2.661925042  
Fe 2.866500000 5.733000000 0.000000000  
Fe 2.721869146 5.654807487 2.514458192  
Fe 5.733000000 0.000000000 0.000000000  
Fe 5.541142411 0.132090795 2.389256485  
Fe 5.733000000 2.866500000 0.000000000  
Fe 5.596719339 2.715760581 2.356172519  
Fe 5.733000000 5.733000000 0.000000000  
Fe 5.972917935 5.728330369 2.415777400  
Fe 1.181832189 1.400100324 1.253821610  
Fe 1.454793968 4.302402228 0.930423999  
Fe 1.432070080 7.171178472 0.864692673  
Fe 4.268326451 1.400969857 0.879207140  
Fe 4.358542100 4.440998844 1.206612987  
Fe 4.327534391 6.913232445 1.320146295  
Fe 7.331478482 1.291665683 1.300279394  
Fe 7.047211555 4.218720936 1.023001149  
Fe 7.182186066 7.429145777 1.261086549  
Au 4.389455535 1.326942867 4.402890902

Au 7.110748280 4.278360634 4.208434040  
Au 4.333239950 7.124187840 4.121160176  
Au 1.408394856 1.298606040 4.323365633  
Fe 4.509029490 4.561646672 3.594245758  
Au 1.499203128 7.059894351 4.362411969  
Au -1.379171885 1.415931122 4.037934963  
Au 1.316758478 4.292191469 4.391402167  
Au -1.408315081 7.181710875 4.169399063

### 4.3.2 Two layers, swap in 1<sup>st</sup> layer

45

Fe 0.000000000 0.000000000 0.000000000  
Fe 0.007534236 0.003968563 2.235219101  
Fe 0.000000000 2.866500000 0.000000000  
Fe -0.057542771 2.611757793 2.406677447  
Fe 0.000000000 5.733000000 0.000000000  
Fe 0.202506261 6.008992442 2.453772272  
Fe 2.866500000 0.000000000 0.000000000  
Fe 2.613700187 -0.061095968 2.406898589  
Fe 2.866500000 2.866500000 0.000000000  
Au 2.966991779 2.966088989 2.615205681  
Fe 2.866500000 5.733000000 0.000000000  
Fe 2.881459932 5.764473267 2.327322814  
Fe 5.733000000 0.000000000 0.000000000  
Fe 6.014625524 0.193874954 2.455512227  
Fe 5.733000000 2.866500000 0.000000000  
Fe 5.757088652 2.889118965 2.330373160  
Fe 5.733000000 5.733000000 0.000000000

Fe 5.417909188 5.415439144 2.518339264  
Fe 1.466990047 1.470074786 0.940856430  
Fe 1.191101109 4.322447045 1.246356308  
Fe 1.468220250 7.166793243 0.865655369  
Fe 4.325392475 1.191785814 1.248037601  
Fe 4.301849137 4.305652802 0.845369280  
Fe 4.450522022 7.293950026 1.314061701  
Fe 7.158878525 1.473652241 0.871775239  
Fe 7.295777454 4.449008582 1.314090844  
Fe 6.993860740 6.991354878 1.314501725  
Au 4.395329721 1.388050517 4.245625678  
Au 7.183254298 4.328969318 4.091365935  
Au 4.334680927 7.173147390 4.093942240  
Au 1.406896556 1.404731499 4.301993216  
Fe 4.403997941 4.396631208 4.188805073  
Au 1.466561909 7.211215121 4.326117220  
Au -1.385641061 1.458706103 4.325418580  
Au 1.398710344 4.397018687 4.250985946  
Au -1.403166571 7.189827529 4.174380012  
Au 0.004418966 2.942445158 6.301734037  
Au 5.699618483 2.990878737 6.183816563  
Au 2.908184792 2.906300300 6.204627244  
Au 3.003559779 5.700842363 6.191201250  
Au 8.609944813 5.768375358 6.340503247  
Au 5.784693213 5.771444602 6.212671107  
Au 0.010807318 8.605769686 6.379338801  
Au 2.942919604 8.600533670 6.308857176  
Au 5.770336289 8.593368829 6.336202540

### 4.3.3 Two layers, swap in 2<sup>nd</sup> layer

45

```
Fe 0.000000000 0.000000000 0.000000000
Fe 0.164226852 0.177301545 2.365617540
Fe 0.000000000 2.866500000 0.000000000
Fe 0.081920088 2.595917792 2.421747841
Fe 0.000000000 5.733000000 0.000000000
Fe -0.239752984 5.973471243 2.352755016
Fe 2.866500000 0.000000000 0.000000000
Fe 2.766430511 0.057366352 2.340363785
Fe 2.866500000 2.866500000 0.000000000
Au 2.941438217 2.696668926 2.671594257
Fe 2.866500000 5.733000000 0.000000000
Fe 3.135920135 5.710985424 2.349697226
Fe 5.733000000 0.000000000 0.000000000
Fe 5.449646566 0.478753935 2.815521604
Fe 5.733000000 2.866500000 0.000000000
Fe 5.685140696 2.919716986 2.347248686
Fe 5.733000000 5.733000000 0.000000000
Fe 5.644999188 5.610019089 2.336372662
Fe 1.445959887 1.445119221 0.840226189
Fe 1.320073054 4.408928951 1.162576280
Fe 1.468226020 6.962482794 1.240726106
Fe 4.405840665 1.341140057 0.998629771
Fe 4.302027151 4.298249180 0.853305375
Fe 4.510456469 7.386474934 1.351810560
Fe 7.019312236 1.267950199 1.271771489
```

Fe 7.406173378 4.241955082 1.289842575  
Fe 6.911218002 7.476077470 1.446195583  
Au 4.284565492 1.530856373 4.929569295  
Au 7.162430666 4.383047495 4.116490623  
Au 4.246309943 7.241532442 4.213653099  
Au 1.368375588 1.432794237 4.608294252  
Au 4.351510361 4.430705132 4.317140323  
Au 1.397447207 7.185068404 4.083869429  
Au -1.458800358 1.555351647 4.492483458  
Au 1.348694704 4.446453513 4.034050735  
Au -1.527140799 7.296904773 4.147222655  
Au 0.021911895 3.372245650 6.354372818  
Au 5.777806135 3.393723314 6.526164611  
Au 2.772749922 3.514238355 6.447250898  
Fe 1.401066058 5.835401343 6.310719557  
Au 7.286635559 5.797921827 6.770389886  
Au 4.290568793 5.833833811 6.873171033  
Au 0.006028108 8.219485046 6.412988752  
Au 2.774677831 8.133704603 6.474551941  
Au 5.754267804 8.252779643 6.466406702

#### 4.3.4 Three layers, swap in 1<sup>st</sup> layer

54

Fe 0.000000000 0.000000000 0.000000000  
Fe -0.016664012 -0.012936039 2.240889637  
Fe 0.000000000 2.866500000 0.000000000  
Fe -0.058430084 2.571785321 2.385205267  
Fe 0.000000000 5.733000000 0.000000000

Fe 0.229452024 6.004031171 2.447522619  
Fe 2.866500000 0.000000000 0.000000000  
Fe 2.572741279 -0.055113275 2.383952575  
Fe 2.866500000 2.866500000 0.000000000  
Au 2.996221218 2.995568719 2.618400878  
Fe 2.866500000 5.733000000 0.000000000  
Fe 2.857257900 5.792481842 2.320236476  
Fe 5.733000000 0.000000000 0.000000000  
Fe 6.001535885 0.230834442 2.450905101  
Fe 5.733000000 2.866500000 0.000000000  
Fe 5.795050795 2.849199176 2.319562837  
Fe 5.733000000 5.733000000 0.000000000  
Fe 5.413648401 5.411851640 2.539906668  
Fe 1.474328095 1.476011842 0.954351979  
Fe 1.184624134 4.322654112 1.255505389  
Fe 1.478216073 7.158598050 0.870858810  
Fe 4.321643739 1.182998212 1.257059712  
Fe 4.313805472 4.312110920 0.858868534  
Fe 4.467645912 7.284100708 1.348612706  
Fe 7.160321117 1.474311339 0.866669048  
Fe 7.289456476 4.462129308 1.346859535  
Fe 6.984406231 6.987039799 1.372523893  
Au 4.401693524 1.405539803 4.293171303  
Au 7.181534982 4.314698096 4.125496305  
Au 4.317891166 7.179679259 4.127407471  
Au 1.428476118 1.428537034 4.312620586  
Fe 4.431239855 4.430259237 4.219912333  
Au 1.456673914 7.226794732 4.355721059  
Au -1.373908450 1.455098623 4.357926181

Au 1.405208256 4.406619977 4.294599467  
Au -1.423601359 7.174156048 4.193861136  
Au 0.041027508 2.926452530 6.385945377  
Au 5.750201698 2.951259997 6.311430725  
Au 2.925851925 2.927931366 6.289883847  
Au 2.955313103 5.754176581 6.315497339  
Au 8.608191962 5.767511850 6.384804373  
Au 5.763039658 5.758142365 6.281670382  
Au 0.025598355 8.628774163 6.446154293  
Au 2.923005713 8.639508805 6.389225889  
Au 5.762650364 8.603324493 6.382832297  
Au -1.429459057 1.495646420 8.384015393  
Au 4.316189603 1.492289212 8.403662251  
Au 1.475323793 1.490400269 8.443677398  
Au -1.392899885 4.337943471 8.428591241  
Au 4.352023689 4.347240654 8.380179463  
Au 1.495617676 4.331262703 8.401534791  
Au -1.418059361 7.175493442 8.435507963  
Au 1.501556804 7.186628902 8.391951309  
Au 4.345211430 7.202064809 8.435956433

#### 4.3.5 Three layers, swap in 2<sup>nd</sup> layer

54

Fe 0.000000000 0.000000000 0.000000000  
Fe 0.017788561 -0.018919922 2.239379267  
Fe 0.000000000 2.866500000 0.000000000  
Fe -0.011300299 2.584072292 2.385512204  
Fe 0.000000000 5.733000000 0.000000000



Fe 0.293418560 5.980669802 2.518733571  
Fe 2.866500000 0.000000000 0.000000000  
Fe 2.544604487 -0.042102259 2.426781223  
Fe 2.866500000 2.866500000 0.000000000  
Au 2.897013658 2.939437752 2.592377018  
Fe 2.866500000 5.733000000 0.000000000  
Fe 2.849131367 5.816470764 2.297069928  
Fe 5.733000000 0.000000000 0.000000000  
Fe 6.047087058 0.123973893 2.409234539  
Fe 5.733000000 2.866500000 0.000000000  
Fe 5.798854196 2.882986002 2.284005527  
Fe 5.733000000 5.733000000 0.000000000  
Fe 5.475541838 5.585614519 2.389846286  
Fe 1.461696769 1.449306479 0.917560297  
Fe 1.185380526 4.334091339 1.237719533  
Fe 1.467353232 7.153825934 0.879352658  
Fe 4.322913187 1.195031240 1.273066256  
Fe 4.314744876 4.301525767 0.863839466  
Fe 4.351900188 7.382691036 1.340675025  
Fe 7.135577091 1.486361997 0.875812653  
Fe 7.305035271 4.466908517 1.359671982  
Fe 7.122200831 6.921677483 1.345978196  
Au 4.400170933 1.355542087 4.249617229  
Au 7.182309855 4.341698004 4.137834777  
Au 4.326018415 7.170120377 4.194525830  
Au 1.411084912 1.384062000 4.366095968  
Au 4.303010240 4.381911785 4.436104136  
Au 1.521512070 7.161023316 4.444970975  
Au -1.388482235 1.463917204 4.305081877

Au 1.408356897 4.388864103 4.391536762  
Au -1.385754551 7.178471567 4.230238726  
Au 0.011385323 2.897546952 6.415132050  
Au 5.782908322 2.881933259 6.389299535  
Au 2.896005221 2.883845147 6.360424032  
Fe 2.868870285 5.758073206 6.541628719  
Au 8.622695790 5.764700002 6.412254091  
Au 5.736517384 5.788550652 6.347961175  
Au 0.022550431 8.630534361 6.466326040  
Au 2.952117901 8.559553298 6.389737341  
Au 5.792466661 8.619696527 6.399404496  
Au -1.401073625 1.486405344 8.452253538  
Au 4.322499478 1.451464660 8.443969491  
Au 1.516510241 1.453895039 8.458306576  
Au -1.425133793 4.357674894 8.449984403  
Au 4.290913540 4.350630907 8.330312228  
Au 1.485451658 4.330024458 8.390148338  
Au -1.409669514 7.174995335 8.462919165  
Au 1.518870969 7.148690302 8.398032229  
Au 4.325974329 7.153940577 8.410104704

#### 4.3.6 Three layers, swap in 3<sup>rd</sup> layer

54

Fe 0.000000000 0.000000000 0.000000000  
Fe -0.014822356 0.025475329 2.251291483  
Fe 0.000000000 2.866500000 0.000000000  
Fe -0.033653906 2.500106693 2.466055619  
Fe 0.000000000 5.733000000 0.000000000

Fe 0.137740861 6.025823281 2.403860087  
Fe 2.866500000 0.000000000 0.000000000  
Fe 2.601516707 -0.044948455 2.392919709  
Fe 2.866500000 2.866500000 0.000000000  
Au 2.915720243 2.790626459 2.630708227  
Fe 2.866500000 5.733000000 0.000000000  
Fe 2.822827279 5.824911881 2.284328652  
Fe 5.733000000 0.000000000 0.000000000  
Fe 5.971163860 0.301778241 2.524417019  
Fe 5.733000000 2.866500000 0.000000000  
Fe 5.801576962 2.846233738 2.288290142  
Fe 5.733000000 5.733000000 0.000000000  
Fe 5.622773997 5.475616100 2.346377060  
Fe 1.452320489 1.468685076 0.920949839  
Fe 1.213048669 4.293083586 1.281939799  
Fe 1.465823574 7.147498586 0.863275088  
Fe 4.339486323 1.184849888 1.216069988  
Fe 4.270570781 4.310308528 0.886774245  
Fe 4.462769532 7.297495638 1.339343913  
Fe 7.147705007 1.477593976 0.886030301  
Fe 7.403363258 4.323439711 1.339072316  
Fe 6.932433403 7.137733789 1.337597964  
Au 4.375865524 1.312441046 4.462109699  
Au 7.180857570 4.312773517 4.140368847  
Au 4.333473368 7.194312307 4.089487586  
Au 1.390128214 1.352951936 4.479353797  
Au 4.352745688 4.357617413 4.304265319  
Au 1.440760742 7.240341859 4.323784142  
Au -1.403861843 1.409044290 4.489180292

Au 1.357614926 4.407448256 4.203454043  
Au -1.431631234 7.206677402 4.194385941  
Au 0.012685303 3.036106743 6.362371925  
Au 5.776467176 3.037822765 6.372805859  
Au 2.879193351 2.988874637 6.292108891  
Au 2.902122692 5.839992671 6.269631691  
Au 8.585682677 5.867026777 6.320450428  
Au 5.769308608 5.897537750 6.280629446  
Au 0.034002290 8.729882153 6.926015831  
Au 2.895775681 8.704312368 6.750368659  
Au 5.783156394 8.725589210 6.813551911  
Au -1.417591308 2.001336576 8.606666051  
Au 4.295008536 2.020030038 8.567679549  
Au 1.511354962 2.093264743 8.600914948  
Au 0.050706240 4.443618917 8.952455202  
Au 5.641372000 4.464272048 8.912753273  
Fe 2.883357600 4.446220455 8.474087774  
Au -1.423743989 6.877456209 8.575925603  
Au 1.507224329 6.788066227 8.548468514  
Au 4.298892380 6.879208090 8.532005983

## 4.4 Swapped geometries, after O<sub>2</sub> adsorption

### 4.4.1 One layer

38

Fe 0.000000000 0.000000000 0.000000000  
Fe 0.180072115 0.014303273 2.329401694  
Fe 0.000000000 2.866500000 0.000000000

Fe 0.200357082 2.478333678 2.585237419  
Fe 0.000000000 5.733000000 0.000000000  
Fe 0.070554499 5.859389114 2.368470929  
Fe 2.866500000 0.000000000 0.000000000  
Fe 2.788138402 -0.033696513 2.278027377  
Fe 2.866500000 2.866500000 0.000000000  
Au 2.913454338 2.759519788 2.674883255  
Fe 2.866500000 5.733000000 0.000000000  
Fe 2.752238232 5.664886227 2.410688458  
Fe 5.733000000 0.000000000 0.000000000  
Fe 5.505237275 0.267996972 2.393497230  
Fe 5.733000000 2.866500000 0.000000000  
Fe 5.547344483 2.778008160 2.389245435  
Fe 5.733000000 5.733000000 0.000000000  
Fe 5.966749907 5.481783413 2.373945317  
Fe 1.433418617 1.475579445 0.865218905  
Fe 1.249457730 4.254142747 1.204132729  
Fe 1.428296446 7.129982315 0.846780929  
Fe 4.298380222 1.409484132 0.815193421  
Fe 4.312586974 4.444009952 1.096520853  
Fe 4.447244011 7.028281526 1.299034496  
Fe 7.198870397 1.585406906 1.210091058  
Fe 7.406359245 4.105149962 1.347094426  
Fe 6.971623544 7.282593688 1.334178311  
Au 4.371343423 1.326161611 4.471344821  
Au 7.206225291 4.099363403 4.106424701  
Au 4.330835385 7.150659787 4.013838862  
Au 1.432801843 1.270284643 4.496140250  
Fe 4.442843305 4.542002988 3.752856577

```
Au 1.437217760 7.136005274 4.200108499
Au -1.442417946 1.295505039 4.165922634
Au 1.321255734 4.342074242 4.240513054
Au -1.432535577 7.135747080 4.067391810
O 4.430002190 4.761503913 5.504418030
O 4.416820537 6.042980314 5.931659976
```

#### 4.4.2 Two layers, swap in 1<sup>st</sup> layer

47

```
Fe 0.000000000 0.000000000 0.000000000
Fe -0.250436504 0.270268721 2.456339110
Fe 0.000000000 2.866500000 0.000000000
Fe -0.096051646 2.830052305 2.268756514
Fe 0.000000000 5.733000000 0.000000000
Fe 0.243725486 5.488582651 2.405922350
Fe 2.866500000 0.000000000 0.000000000
Fe 3.107921425 -0.080508555 2.382134171
Fe 2.866500000 2.866500000 0.000000000
Au 2.811643198 2.927787100 2.615618448
Fe 2.866500000 5.733000000 0.000000000
Fe 2.928795165 5.766765439 2.319808356
Fe 5.733000000 0.000000000 0.000000000
Fe 5.714036245 0.037180029 2.272691752
Fe 5.733000000 2.866500000 0.000000000
Fe 5.772518058 2.722053753 2.476980694
Fe 5.733000000 5.733000000 0.000000000
Fe 5.552391366 5.997419599 2.474771919
Fe 1.429609270 1.210750765 1.227208969
```

Fe 1.429547602 4.293453485 0.851879617  
Fe 1.278241305 7.306010702 1.285949509  
Fe 4.290556104 1.465628528 0.958632873  
Fe 4.532532781 4.315991012 1.292444690  
Fe 4.276296323 7.140133968 0.864921078  
Fe 7.152125032 1.449385273 0.842176773  
Fe 6.996143033 4.465468969 1.325516006  
Fe 7.362509452 7.078477018 1.309563239  
Au 4.334401974 1.385499282 4.300420132  
Au 7.211859144 4.340079068 4.134559571  
Au 4.215280972 7.138298717 4.309892106  
Au 1.343847272 1.412481531 4.288355980  
Fe 4.555012531 4.406434676 3.790137635  
Au 1.389962104 7.212806510 4.120491493  
Au -1.456696703 1.476031867 4.345461116  
Au 1.495563124 4.433414379 4.409698883  
Au -1.434508987 7.200934260 4.171917561  
Au 0.025227237 2.934029560 6.337202563  
Au 5.744494609 2.892794593 6.269664610  
Au 2.960897666 2.937514676 6.221463732  
Au 2.749356845 5.760250670 6.484890306  
Au 8.506768145 5.801484762 6.374254319  
Au 5.671497751 5.634818610 6.120530695  
Au -0.027061482 8.598877935 6.369105394  
Au 2.810393944 8.638279420 6.287023412  
Au 5.743787964 8.559845982 6.343786103  
O 4.193967544 6.326491757 8.146816139  
O 4.177316976 5.706110224 9.256117359

#### 4.4.3 Two layers, swap in 2<sup>nd</sup> layer

47

```
Fe 0.000000000 0.000000000 0.000000000
Fe -0.275582106 0.227257244 2.452178880
Fe 0.000000000 2.866500000 0.000000000
Fe -0.085793841 2.818160058 2.270821355
Fe 0.000000000 5.733000000 0.000000000
Fe 0.268151336 5.516606044 2.428317662
Fe 2.866500000 0.000000000 0.000000000
Fe 3.155567237 -0.103137679 2.424776065
Fe 2.866500000 2.866500000 0.000000000
Au 2.813463275 2.932148849 2.622341668
Fe 2.866500000 5.733000000 0.000000000
Fe 2.882924107 5.793355907 2.288089226
Fe 5.733000000 0.000000000 0.000000000
Fe 5.726386942 0.023075326 2.239694304
Fe 5.733000000 2.866500000 0.000000000
Fe 5.797185756 2.602634847 2.412247722
Fe 5.733000000 5.733000000 0.000000000
Fe 5.519918317 6.006759143 2.482076303
Fe 1.434718894 1.196772095 1.263425676
Fe 1.433982392 4.291909734 0.852794318
Fe 1.304266548 7.330074140 1.304835840
Fe 4.264889372 1.452149704 0.936566832
Fe 4.551265791 4.316994525 1.265932543
Fe 4.266250176 7.133142558 0.848566925
Fe 7.178875936 1.471613463 0.836216639
```



Fe 7.036923596 4.456550347 1.325458885  
Fe 7.307272674 6.999481283 1.326731841  
Au 4.313808189 1.365789019 4.341252225  
Au 7.182850397 4.348673244 4.119997617  
Au 4.258606282 7.156150892 4.400506880  
Au 1.320569429 1.397577167 4.287776553  
Au 4.382962425 4.381277729 4.320727377  
Au 1.408967351 7.216200718 4.116632284  
Au -1.489787611 1.472035918 4.366376012  
Au 1.478308245 4.425317053 4.457780139  
Au -1.446684089 7.203865991 4.186312568  
Au -0.079897410 3.007626131 6.351489664  
Au 5.690046768 2.923346935 6.369296848  
Au 2.814616696 2.837063065 6.313799581  
Fe 3.157641301 5.616361143 6.513128597  
Au 8.650995911 5.923145048 6.284800893  
Au 5.839065812 5.790508775 6.367247262  
Au -0.102747258 8.702762236 6.434886304  
Au 2.715560388 8.482256331 6.315110829  
Au 5.679545269 8.616680036 6.452704410  
O 3.133267368 5.625911765 8.143238075  
O 3.525984998 5.543177591 9.333845033

#### 4.4.4 Three layers, swap in 1<sup>st</sup> layer

56

Fe 0.000000000 0.000000000 0.000000000  
Fe 0.017195106 -0.017330069 2.235142292  
Fe 0.000000000 2.866500000 0.000000000

Fe -0.027695702 2.587469430 2.386212094  
Fe 0.000000000 5.733000000 0.000000000  
Fe 0.255109624 6.000901814 2.463055201  
Fe 2.866500000 0.000000000 0.000000000  
Fe 2.599724215 -0.018472837 2.390257434  
Fe 2.866500000 2.866500000 0.000000000  
Au 2.959018261 2.970280748 2.602959007  
Fe 2.866500000 5.733000000 0.000000000  
Fe 2.869877534 5.778979964 2.320277288  
Fe 5.733000000 0.000000000 0.000000000  
Fe 6.048393838 0.186913392 2.450965937  
Fe 5.733000000 2.866500000 0.000000000  
Fe 5.735813640 2.934018207 2.346859361  
Fe 5.733000000 5.733000000 0.000000000  
Fe 5.432502358 5.437780894 2.535269129  
Fe 1.450929631 1.465084696 0.917164242  
Fe 1.184946762 4.323505438 1.243380719  
Fe 1.491373149 7.158653448 0.873701564  
Fe 4.350644480 1.191848297 1.246353276  
Fe 4.312639456 4.322158655 0.860501304  
Fe 4.453940916 7.313790851 1.355172667  
Fe 7.134160600 1.492057642 0.902633792  
Fe 7.303296668 4.458964767 1.348139523  
Fe 7.011662122 6.965880278 1.350034981  
Au 4.438583531 1.406850236 4.254619264  
Au 7.206155101 4.303531972 4.118714755  
Au 4.326990977 7.172926176 4.131164537  
Au 1.433509692 1.426134998 4.328389419  
Fe 4.469468246 4.385607987 4.188729920

Au 1.470656661 7.230633336 4.354553204  
Au -1.350498058 1.446842143 4.349143468  
Au 1.423848197 4.408927150 4.305158938  
Au -1.401056734 7.160358446 4.192063753  
Au 0.074324585 2.911227182 6.417676722  
Au 5.793254732 2.924331059 6.337862932  
Au 2.975842795 2.915656663 6.260318839  
Au 2.989649842 5.739367017 6.315982726  
Au 8.650639412 5.754245558 6.395606154  
Au 5.781610050 5.730612457 6.255149505  
Au 0.072731378 8.619742689 6.478293850  
Au 2.977268833 8.637774411 6.359429602  
Au 5.816362526 8.597659582 6.392820439  
Au -1.381342804 1.485145230 8.402917984  
Au 4.373439660 1.451776420 8.486347321  
Au 1.546265560 1.457514542 8.512681253  
Au -1.352700289 4.347435853 8.485109620  
Au 4.450709436 4.215519739 8.404336264  
Au 1.485898806 4.209308479 8.420191547  
Au -1.345125963 7.136503485 8.476170160  
Au 1.502089905 7.281087210 8.446830028  
Au 4.462618689 7.275915861 8.417095744  
O 3.680426417 5.716905766 9.914222515  
O 2.277612232 5.745044322 9.905728622

#### 4.4.5 Three layers, swap in 2<sup>nd</sup> layer

56

Fe 0.000000000 0.000000000 0.000000000

Fe 0.038008684 -0.008872816 2.263327700  
Fe 0.000000000 2.866500000 0.000000000  
Fe 0.027076775 2.612828840 2.387676698  
Fe 0.000000000 5.733000000 0.000000000  
Fe 0.347467098 5.998132480 2.554996685  
Fe 2.866500000 0.000000000 0.000000000  
Fe 2.586771896 0.038734339 2.410435874  
Fe 2.866500000 2.866500000 0.000000000  
Au 2.887784822 2.930988802 2.585182525  
Fe 2.866500000 5.733000000 0.000000000  
Fe 2.845486220 5.826842054 2.288449333  
Fe 5.733000000 0.000000000 0.000000000  
Fe 6.059002228 -0.115062281 2.448326230  
Fe 5.733000000 2.866500000 0.000000000  
Fe 5.717835207 3.085179877 2.356910531  
Fe 5.733000000 5.733000000 0.000000000  
Fe 5.527127973 5.660476405 2.370179059  
Fe 1.426043164 1.454469002 0.894217479  
Fe 1.191644713 4.338026185 1.218859654  
Fe 1.449109883 7.190436035 0.860395789  
Fe 4.438908568 1.262066788 1.255328547  
Fe 4.303504233 4.334630067 0.866867011  
Fe 4.326125171 7.435739820 1.338783116  
Fe 6.981062817 1.500108576 1.131099473  
Fe 7.333849853 4.457941097 1.366571205  
Fe 7.214839260 6.886191490 1.301431261  
Au 4.421247409 1.365477068 4.239699167  
Au 7.244426096 4.338802726 4.148405560  
Au 4.343463097 7.190141573 4.208652020

Au 1.415589303 1.415665487 4.386190360  
Au 4.340641180 4.414366652 4.414902617  
Au 1.563977583 7.211046928 4.433491571  
Au -1.391094222 1.451370159 4.255876276  
Au 1.471695088 4.430451053 4.412010170  
Au -1.318947148 7.163619111 4.311833574  
Au 0.044319381 2.910031347 6.407739554  
Au 5.805454305 2.888732904 6.362337869  
Au 2.936070718 2.879713329 6.361852466  
Fe 2.909374282 5.829672824 6.462150063  
Au 8.673169591 5.772431313 6.452956074  
Au 5.779577183 5.791471130 6.375888602  
Au 0.053440061 8.643191296 6.497644965  
Au 2.985723022 8.566290397 6.412652076  
Au 5.822302285 8.627696778 6.424265803  
Au -1.351499156 1.504614896 8.524137135  
Au 4.444212117 1.343036186 8.476665429  
Au 1.481254456 1.350468482 8.487861072  
Au -1.381640035 4.322339643 8.472589355  
Au 4.337589014 4.394211585 8.302337629  
Au 1.542344832 4.394343861 8.370112361  
Au -1.380973539 7.177131430 8.469244044  
Au 1.543356297 7.151535340 8.500351506  
Au 4.348660368 7.145819038 8.478729708  
O 3.648435077 2.749136397 10.037728021  
O 2.274856006 2.733111268 10.034982738

#### 4.4.6 Three layers, swap in 3<sup>rd</sup> layer

Fe 0.00000000 0.00000000 0.00000000  
Fe 0.016354463 0.007024135 2.234328622  
Fe 0.000000000 2.866500000 0.000000000  
Fe -0.048077286 2.562296913 2.413114136  
Fe 0.000000000 5.733000000 0.000000000  
Fe 0.255829115 6.040245129 2.482723142  
Fe 2.866500000 0.000000000 0.000000000  
Fe 2.559808968 -0.006124697 2.418210925  
Fe 2.866500000 2.866500000 0.000000000  
Au 2.887866524 2.853835336 2.599633400  
Fe 2.866500000 5.733000000 0.000000000  
Fe 2.846129659 5.783042349 2.278415060  
Fe 5.733000000 0.000000000 0.000000000  
Fe 6.034921967 0.165420598 2.422574169  
Fe 5.733000000 2.866500000 0.000000000  
Fe 5.806783977 2.850957102 2.288598640  
Fe 5.733000000 5.733000000 0.000000000  
Fe 5.470936119 5.557267413 2.371311940  
Fe 1.439754900 1.451654901 0.905425343  
Fe 1.171552359 4.318941222 1.295758373  
Fe 1.486314365 7.157939952 0.875697967  
Fe 4.328547883 1.187190432 1.257279586  
Fe 4.289529723 4.291790967 0.860445998  
Fe 4.368812035 7.366573832 1.325054928  
Fe 7.135533374 1.496116520 0.880602534  
Fe 7.301665008 4.465911451 1.346601357  
Fe 7.082012187 6.956598530 1.326941706  
Au 4.380400182 1.322202681 4.315822722

Au 7.164101371 4.340960188 4.109191523  
Au 4.324872790 7.180543548 4.135655008  
Au 1.388155026 1.395313302 4.435631365  
Au 4.323925833 4.337082038 4.356929110  
Au 1.476283208 7.252655054 4.406278234  
Au -1.399940930 1.432650604 4.373680743  
Au 1.374100732 4.407995431 4.274103228  
Au -1.414925107 7.204319639 4.214301398  
Au 0.006611298 2.969823742 6.337073160  
Au 5.768112751 2.937927569 6.358109484  
Au 2.907481195 2.951847231 6.398510236  
Au 2.915427889 5.733958219 6.428689972  
Au 8.578818803 5.816581152 6.316595935  
Au 5.759687423 5.788599559 6.323798615  
Au 0.025906284 8.678774090 6.875350280  
Au 2.844406676 8.650608429 6.539654967  
Au 5.813362085 8.630698035 6.530529075  
Au -1.477048004 1.885822350 8.553188940  
Au 4.286639176 1.584733977 8.458816484  
Au 1.448964862 1.987128415 8.590115677  
Au -0.175340827 4.377577271 8.840865088  
Au 5.338104663 4.368859304 8.731226590  
Fe 2.552553194 4.370570407 8.793544100  
Au -1.503200671 6.855238484 8.539196713  
Au 1.419903521 6.766225948 8.558774617  
Au 4.270199851 7.148861423 8.457434688  
O 4.349226150 4.400415672 10.731617680  
O 3.056505607 4.430231073 10.411410671
